# Supplementary material
Source: Springer Nature journal article supplement (https://www.springermedizin.de/resource/supplementary/12985_2011_1295_MOESM1_ESM.pdf/9609482)

**(A)****(i) type I**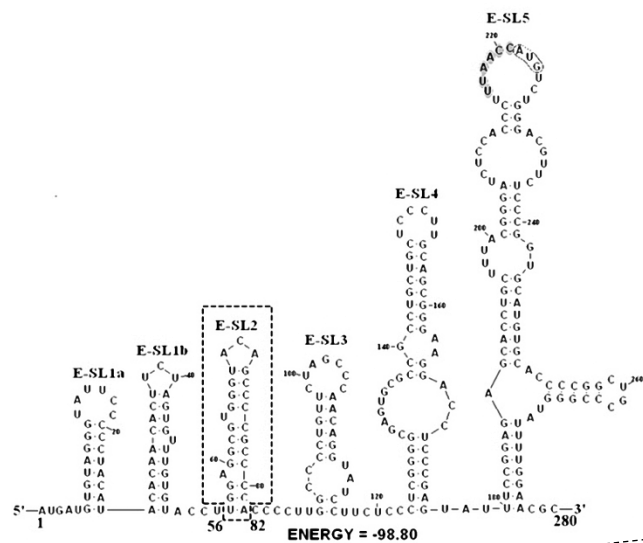**(ii) type II**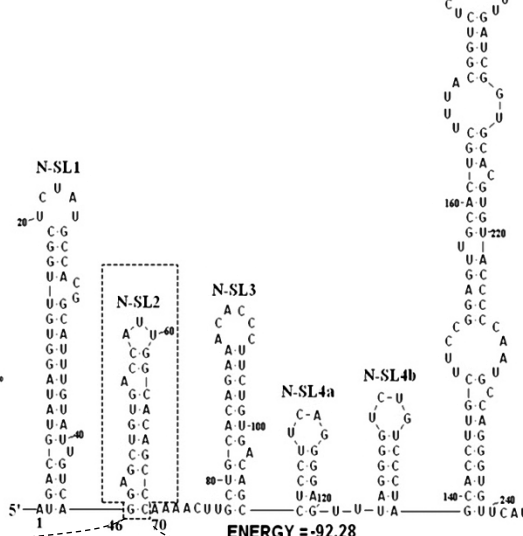**(iii) EX**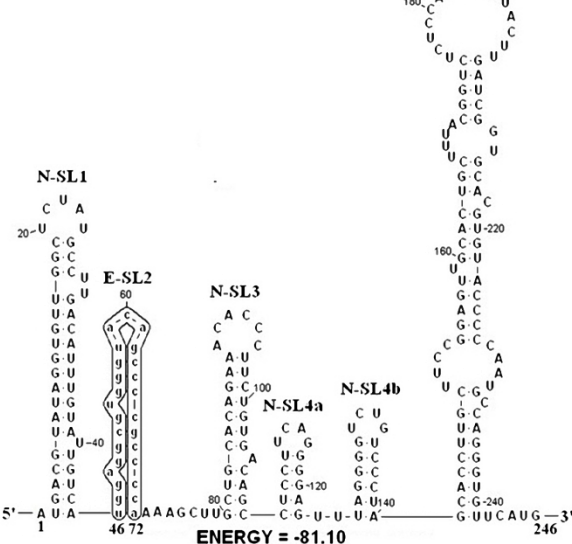**(B)**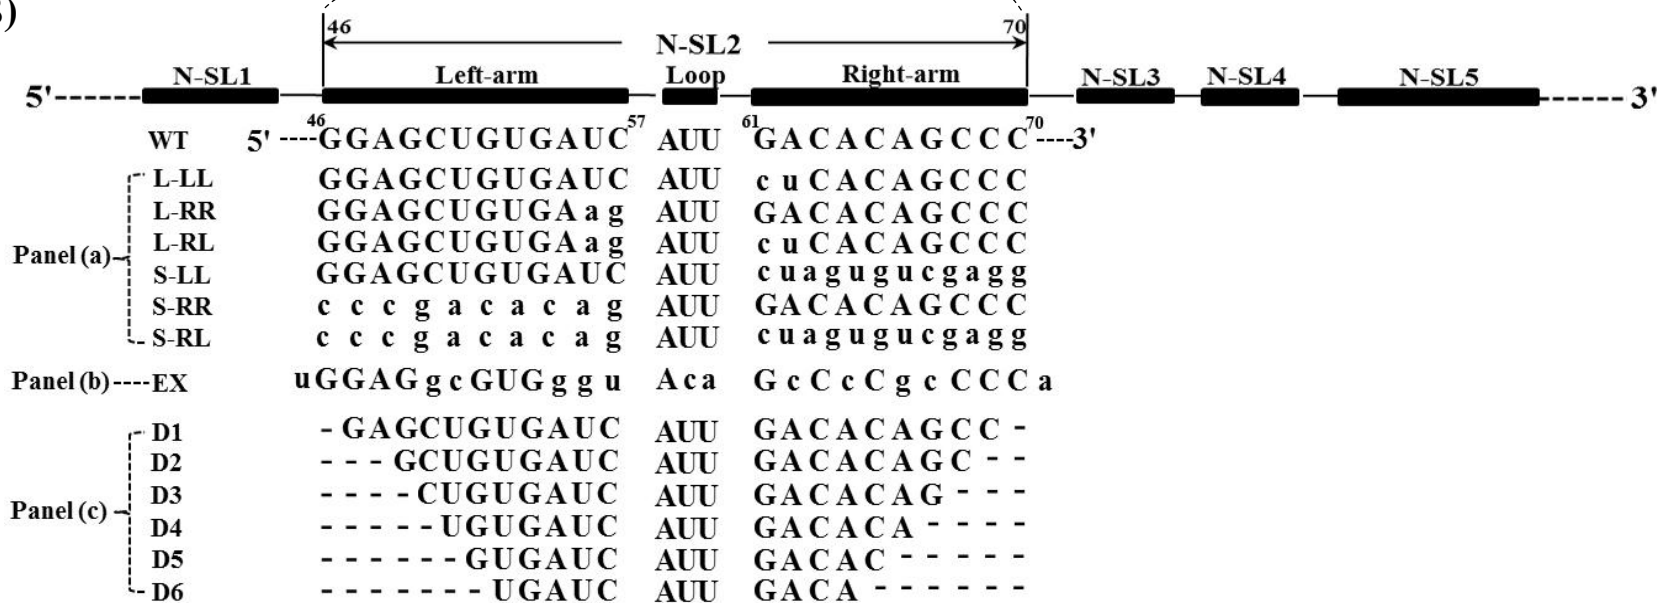

Supplement: MOESM1 [file 9609482]
